# Supplementary material for: Radiomic features from MRI distinguish myxomas from myxofibrosarcomas
Source: BMC Med Imaging. 2019 Aug 15;19:67. doi: 10.1186/s12880-019-0366-9 (PMC6694512; doi:10.1186/s12880-019-0366-9)
Supplement: Supplementary file 1 — Radiomic features adopted in this study. This file shows how all of the radiomic features used in this study were calculated. (DOCX 28 kb) [file 12880_2019_366_MOESM1_ESM.docx]

**Supplementary data**

**Radiomic features adopted in this study**

All the radiomic features used in this study are listed in table S1, and more details could be found at http://pyradiomics.readthedocs.io/en/1.1.1/features.html.

Table S1. Radiomic features adopted in this study.

| Morphometry | Volume ()  Elongation  Spherical Disproportion  Sphericity  Surface Volume Ratio  Surface Area ()  Maximum 3D Diameter  Maximum 2D Diameter axial  Maximum 2D Diameter coronal  Maximum 2D Diameter sagittal  where , , and are the lengths of the largest, second largest and smallest principal component axes. |
| --- | --- |
| First-order statistics | Minimum  Maximum  Mean  Standard Deviation  Variance  Skewness  Kurtosis  Median  Range  10-th Percentile  90-th Percentile  Interquartile Range  Mean Absolute Deviation  Robust Mean Absolute Deviation  Root Mean Squared  Uniformity  Energy  Total Energy  Entropy  where denotes the 3D image matrix with voxels, is the normalized first order histogram with intensity levels, is the volume of the voxel in , is the -th percentile of the image matrix, denotes the subset of image matrix with intensity levels in between the 10-th and 90-th percentile, and is an arbitrary small positive number. |
| Gray level co-occurrence matrix (GLCM) | Energy  Contrast  Entropy  Homogeneity 1  Correlation  Sum Average (SA)  Autocorrelation  Sum Variance  Homogeneity 2  Cluster Shade  Maximum Probability  Inverse Difference Moment Normalized  Difference Entropy  Inverse Variance  Dissimilarity  Difference Variance  Inverse Difference Normalized  Inverse Difference moment  Sum Entropy (SE)  Sum of Squares  Cluster Prominence  Informal Measure of Correlation 1  Informal Measure of Correlation 2  Difference Average (DA)  Inverse Difference  Cluster Tendency  Sum Variance 2  Average Intensity  where is the normalized co-occurrence matrix, is the number of intensity levels, , , , , and are the standard deviation of and , where , where , , , , , , and is an arbitrary small positive number. |
| Gray level run length matrix (GLRLM) | Short Run Emphasis  Long Run Emphasis  Gray Level Non-uniformity  Run Length Non-uniformity  Low Gray Level Run Emphasis  High Gray Level Run Emphasis  Short Run Low Gray Level Emphasis  Short Run High Gray Level Emphasis  Long Run Low Gray Level Emphasis  Long Run High Gray Level Emphasis  Gray Level Variance where  Run Variance where  Run Entropy  Run Percentage  Gray Level Non-uniformity Normalized  Run Length Non-uniformity Normalized  where is the run length matrix for direction , is the number of intensity levels, is the number of run lengths, is the number of voxels, and is an arbitrary small positive number. |
| Gray level size zone matrix (GLSZM) | Small Area Emphasis  Large Area Emphasis  Gray Level Non-uniformity  Size Zone Non-uniformity  Zone Percentage  Low Gray Level Zone Emphasis  High Gray Level Zone Emphasis  Small Area Low Gray Level Emphasis  Small Area High Gray Level Emphasis  Large Area Low Gray Level Emphasis  Large Area High Gray Level Emphasis  Gray Level Variance where  Zone Variance where  Gray Level Non-uniformity Normalized  Size Zone Non-uniformity Normalized  Zone Entropy  where is the size zone matrix, is the number of intensity levels, is the number of zone sizes, is the number of voxels, and is an arbitrary small positive number. |
